# Supplementary material
Source: PubMed Central journal article supplement (PMC5166484)
Supplement: ijbsv12p1415s1.pdf [file ijbsv12p1415s1.pdf]

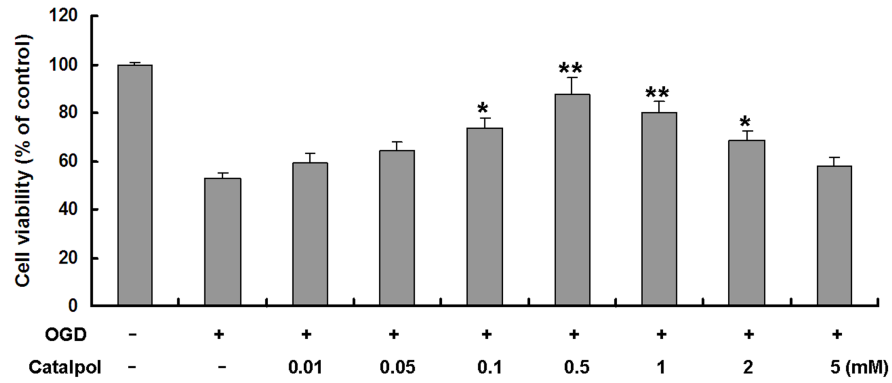

**Figure S1. Effects of varying concentrations of catalpol on OGD-induced cytotoxicity in cultured PreOLs measured by MTT assay.** PreOLs were preincubated with different concentrations of catalpol for 1 h prior to OGD. After the treatment, cell viability was estimated by MTT assay (0.5 mg/ml). Data are expressed as percentages of the values in the CTL group and are shown as the means  $\pm$  SEM (n = 6 in each group). \* $p$  < 0.05, \*\* $p$  < 0.01 in comparison with cells exposed to OGD alone.
